# Supplementary material for: Comprehensive Characterization of Viral Diversity of Female Mosquitoes in Madagascar
Source: MDPI journal article supplement (doi:10.3390/v15091852), 2023-08-31
Supplement: s1 [file s1]

Relative abundance of viral species according to collection site, season & mosquito species

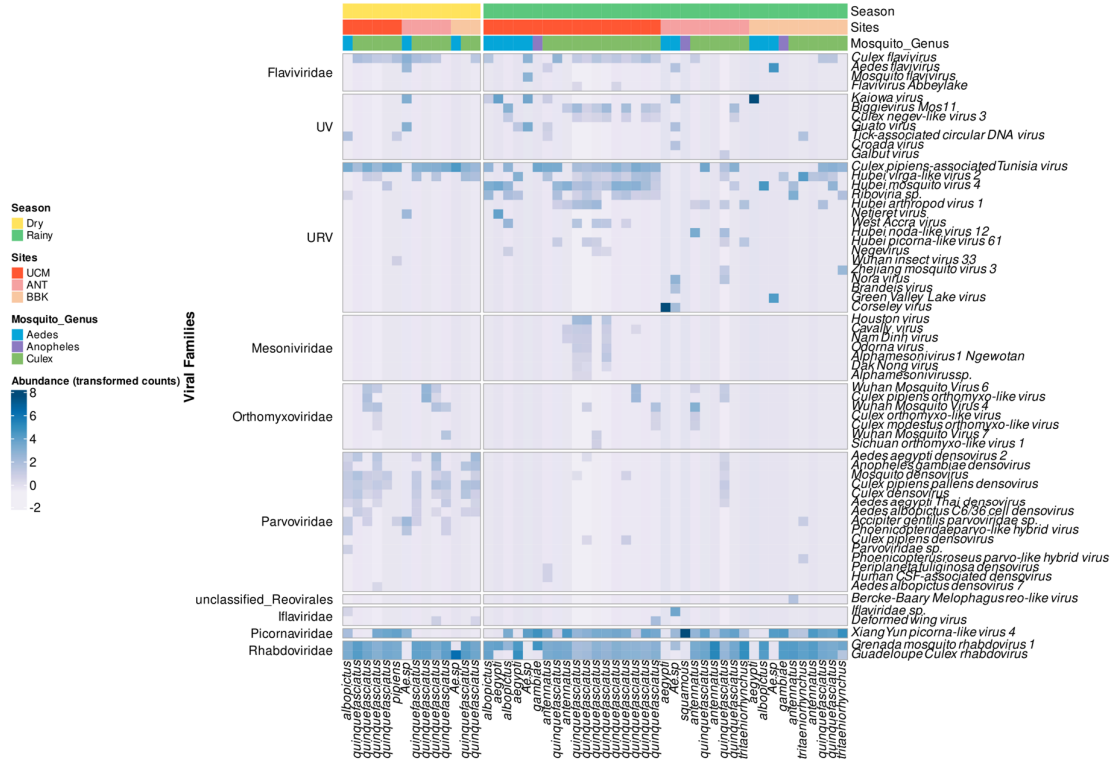

**Figure S1:** Relative abundance of viral species according to the season, sites, and genus of collected mosquitoes.

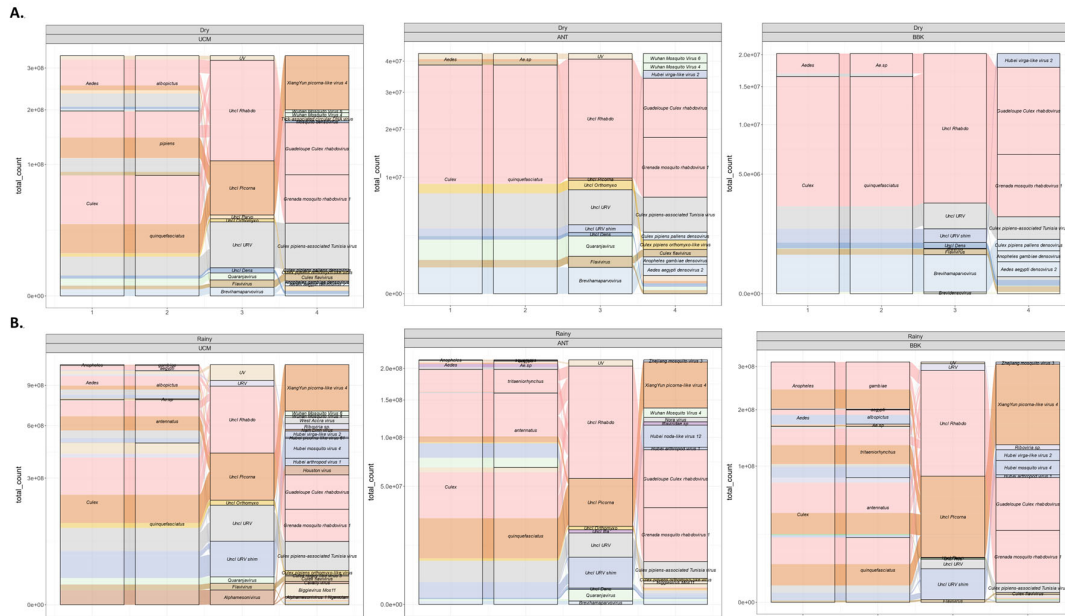

**Figure S2:** Alluvial plot showing the 62 viral species with >90% amino-acid identity to their known reference sequences, for all collection sites (UCM, ANT, and BBK) and the two seasons (A) dry and (B) rainy.

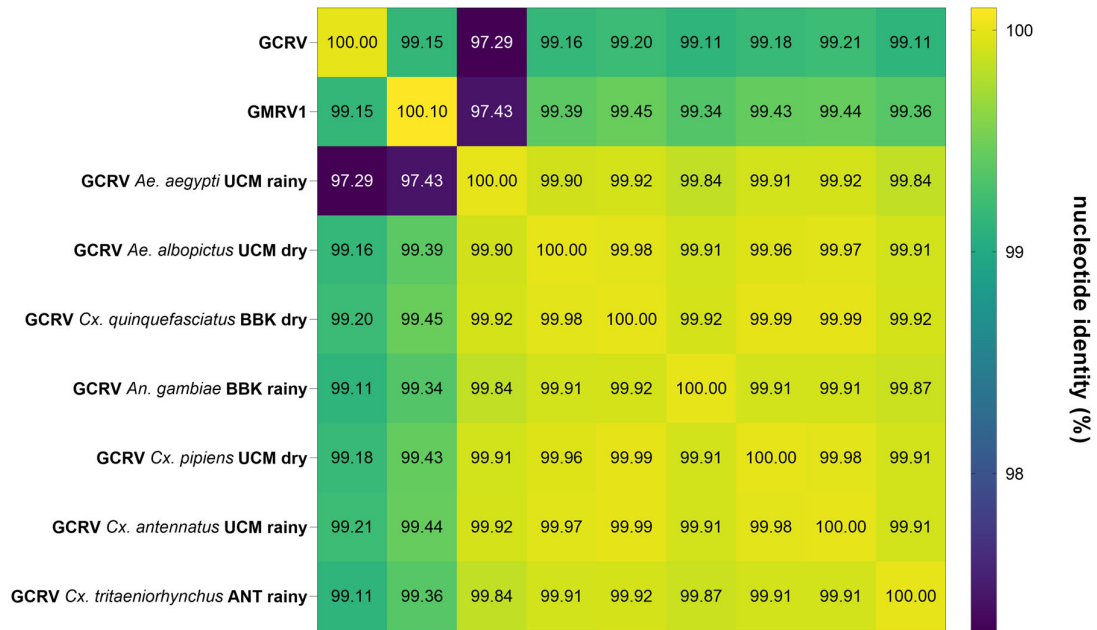

**Figure S3:** Pairwise nucleotide identity percentage across *Guadeloupe Culex rhabdovirus* from different seasons, sites, and mosquito host species of Madagascar.

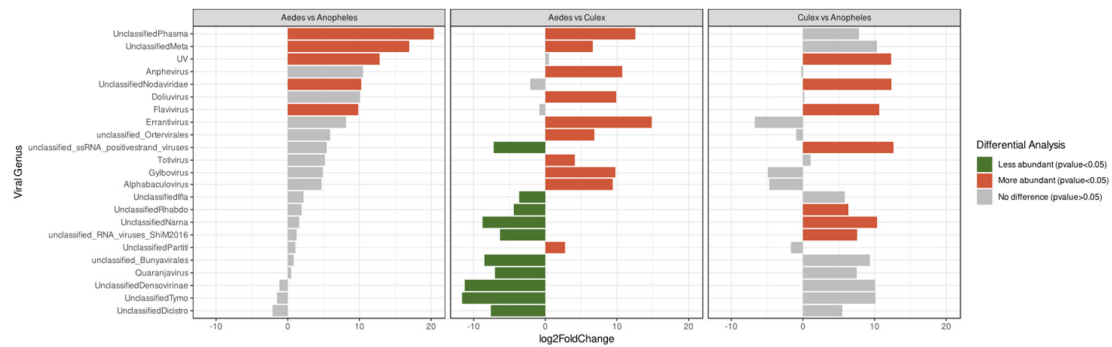

**Figure S4:** Log2 fold change for the comparisons of *Culex*, *Aedes*, and *Anopheles* in the differential analysis conducted. The color corresponds to significant viral genera.

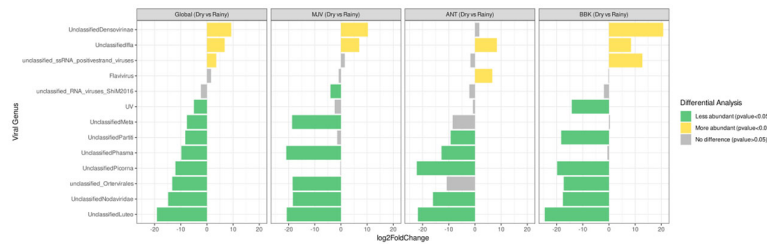

**Figure S5:** Log2 fold change for the comparisons of dry/rainy seasons in the differential analysis conducted on *Culex quinquefasciatus* mosquitoes. Each panel represents a different site studied. The color corresponds to significant viral genera.
